# Supplementary material for: T-Cell Receptor Repertoire Characteristics Associated with Prognostic Significance in High-Grade Serous Ovarian Carcinoma
Source: MDPI journal article supplement (doi:10.3390/genes14040785), 2023-03-24
Supplement: s1 [file s1]

Article

# T-Cell Receptor Repertoire Characteristics Associated with Prognostic Significance in High-Grade Serous Ovarian Carcinoma

Ju-Won Kim <sup>1</sup>, Sewha Kim <sup>2,3</sup>, So-Yun Yang <sup>1</sup>, Je-Gun Joung <sup>1,4,5,\*</sup> and Sohyun Hwang <sup>1,2,5,\*</sup>

<sup>1</sup> Department of Biomedical Science, College of Life Science, CHA University, Seongnam 13488, Republic of Korea; seven1009@naver.com (J.-W.K.)

<sup>2</sup> Department of Pathology, CHA Bundang Medical Center, CHA University School of Medicine, Seongnam 13496, Republic of Korea

<sup>3</sup> Department of Pathology, Korea Medical Institute, Seoul 03173, Republic of Korea

<sup>4</sup> Institute for Biomedical Informatics, CHA University School of Medicine, Seongnam 13488, Republic of Korea

<sup>5</sup> CHA Future Medicine Research Institute, CHA Bundang Medical Center, Seongnam 13488, Republic of Korea

\* Correspondence: jgjoung@cha.ac.kr (J.-G.J.); blissfulwin@cha.ac.kr (S.H.)

**Supplementary Figures:**

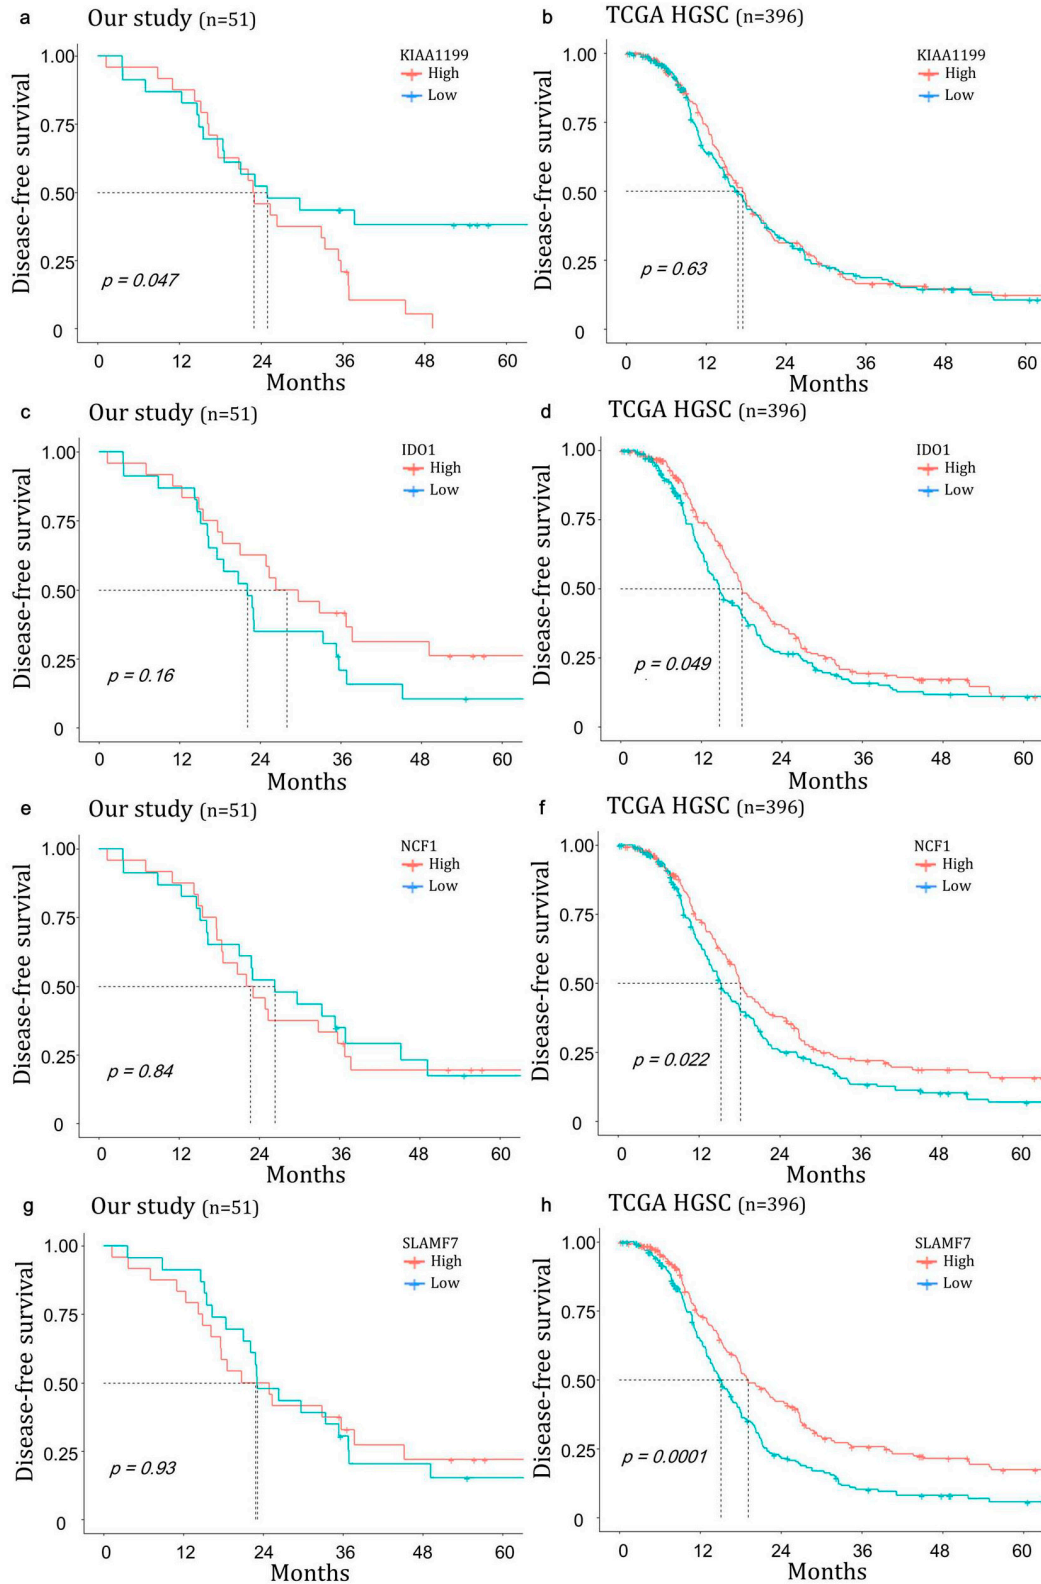

**Figure S1.** The survival analysis for 4 differentially expressed genes in our study and TCGA high-grade serous ovarian carcinoma (HGSC) data. For survival analysis, disease-free survival data were analyzed in both data. Survival results were shown for *KIAA1199* in our study (a) and TCGA HGSC (b), for *IDO1* in our study (c) and TCGA HGSC (d) for *NCF1* in our study (e) and TCGA HGSC (f) and for *SLAMF7* in our study (g) and TCGA HGSC data (f), respectively.

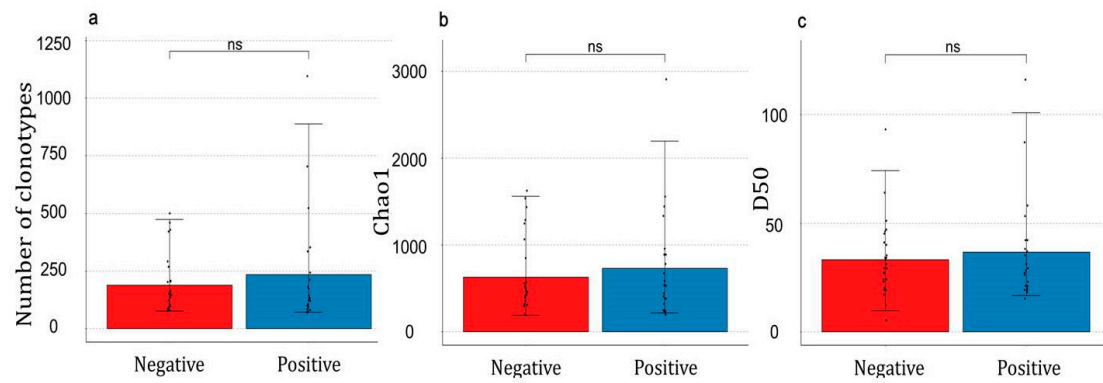

**Figure S2.** The expression pattern of the TCR repertoire in patient groups divided based on HRD mutation. **(a)** T-cell receptor counts of unique TCR clonotypes. **(b–c)** Richness and diversity of TCR estimated by Chao1, and D50 index in patient groups divided based on HRD mutation. **(a–c)** Non-significant  $p$ -values are indicated as ns.
